# Supplementary material for: Seasonal and geographic variation in insecticide resistance in Aedes aegypti in southern Ecuador
Source: PLoS Negl Trop Dis. 2019 Jun 10;13(6):e0007448. doi: 10.1371/journal.pntd.0007448 (PMC6586360; doi:10.1371/journal.pntd.0007448)
Supplement: S10 Table — (DOCX) [file pntd.0007448.s010.docx]

S10 Table. V1016I and F1534C Genotypes compared to deltamethrin-resistant phenotype

| V1016I |  | I/I  (mutant) | V/I  (heterozygote) | V/V  (wild type) | *p*-valuea |
| --- | --- | --- | --- | --- | --- |
|  | *Resistant* | 107 | 79 | 10 | <0.001* |
|  | *Susceptible* | 17 | 88 | 52 |
| F1534C |  | C/C  (mutant) | F/C  (heterozygote) | F/F  (wild type) |  |
|  | *Resistant* | 190 | 5 | 1 | 0.10 |
|  | *Susceptible* | 144 | 10 | 3 |

aFisher’s Exact Test
